# Supplementary material for: BMAL1 Promotes Valvular Interstitial Cells’ Osteogenic Differentiation through NF-κ B/AKT/MAPK Pathway
Source: MDPI journal article supplement (doi:10.3390/jcdd10030110), 2023-03-06
Supplement: s1 [file s1]

Supplementary Table S1

|                  |   | Primer sequences(5'to3')  |
|------------------|---|---------------------------|
| Binding site 1/2 | F | GGTAGGCAGTCCCACCTTACTTAA  |
|                  | R | ACTGACTCTGTTGGTCTCGGTG    |
| Binding site 3   | F | CCCTCCTTTTGTTTACTTTGGA    |
|                  | R | CACTGGTAGGGTATGGGAATGA    |
| Binding site 4   | F | CTTCAAAGTAGGCATGAGATAATGG |
|                  | R | GGTGGCTGGATTCCTTCTGTT     |

Supplementary Table S1: Primer sequences used in Chip.
